# Supplementary material for: Evidence for Human-Centric In-Vehicle Lighting: Part 1
Source: MDPI journal article supplement (doi:10.3390/app12020552), 2022-01-06
Supplement: s1 [file s1]

SUPPLEMENTARY DATA FOR “EVIDENCE FOR HUMAN-CENTRIC IN-VEHICLE LIGHTING: PART 1”

S1: Color-mood relations

Color-mood relation: Joy, Part 1

**Table S1.** Statistical evaluation of the color-joy rating, differences of the mean values  $\Delta\bar{x}$ , z-score, probability value  $p$ , effect power  $r$  and quantification of it. If  $p < 0.05$ , it is bold marked. Participants for each group are summed up in the heading.

| Color         | 1. China: Men                    |        |                                         |              |               |                                   |        |                                         |              |             |                                   |        |                                         |              |             |
|---------------|----------------------------------|--------|-----------------------------------------|--------------|---------------|-----------------------------------|--------|-----------------------------------------|--------------|-------------|-----------------------------------|--------|-----------------------------------------|--------------|-------------|
|               | 2. China: Women, $n$ (1+2) = 161 |        |                                         |              |               | 3. Europe: Men, $n$ (1+3) = 136   |        |                                         |              |             | 4. Europe: Women, $n$ (1+4) = 137 |        |                                         |              |             |
|               | $\Delta\bar{x}$                  | $z$    | $p$ (asym.)                             | $r$          | level         | $\Delta\bar{x}$                   | $z$    | $p$ (asym.)                             | $r$          | level       | $\Delta\bar{x}$                   | $z$    | $p$ (asym.)                             | $r$          | level       |
| Red           | 0.711                            | 3.088  | <b><math>2.01 \times 10^{-3}</math></b> | <b>0.243</b> | <b>weak</b>   | 0.468                             | 1.631  | 0.103                                   | not sign.    | not sign.   | 0.828                             | 3.284  | <b><math>1.02 \times 10^{-3}</math></b> | <b>0.281</b> | <b>weak</b> |
| Orange        | 0.329                            | 1.539  | 0.124                                   | not sign.    | not sign.     | -0.047                            | -0.186 | 0.852                                   | not sign.    | not sign.   | 0.492                             | 2.055  | <b><math>3.99 \times 10^{-2}</math></b> | <b>0.176</b> | <b>weak</b> |
| Yellow        | 0.083                            | 0.357  | 0.721                                   | not sign.    | not sign.     | -0.340                            | -1.315 | 0.188                                   | not sign.    | not sign.   | -0.235                            | -0.918 | 0.359                                   | not sign.    | not sign.   |
| Green         | 0.297                            | 1.298  | 0.194                                   | not sign.    | not sign.     | -0.020                            | -0.050 | 0.960                                   | not sign.    | not sign.   | 0.236                             | 0.831  | 0.406                                   | not sign.    | not sign.   |
| Cyan          | 0.092                            | 0.352  | 0.725                                   | not sign.    | not sign.     | -0.457                            | -1.649 | 0.099                                   | not sign.    | not sign.   | -0.604                            | -2.264 | <b><math>2.36 \times 10^{-2}</math></b> | <b>0.193</b> | <b>weak</b> |
| Blue          | 0.323                            | 1.397  | 0.162                                   | not sign.    | not sign.     | -0.224                            | -0.592 | 0.554                                   | not sign.    | not sign.   | 0.429                             | 1.266  | 0.205                                   | not sign.    | not sign.   |
| Purple        | 0.662                            | 2.749  | <b><math>5.97 \times 10^{-3}</math></b> | <b>0.217</b> | <b>weak</b>   | 0.465                             | 1.675  | 0.094                                   | not sign.    | not sign.   | 0.225                             | 0.850  | 0.395                                   | not sign.    | not sign.   |
| Cold White    | -0.002                           | -0.155 | 0.877                                   | not sign.    | not sign.     | 0.490                             | 1.954  | <b><math>5.00 \times 10^{-2}</math></b> | <b>0.168</b> | <b>weak</b> | 0.464                             | 1.977  | <b><math>4.81 \times 10^{-2}</math></b> | <b>0.169</b> | <b>weak</b> |
| Warm White    | -0.379                           | -1.655 | 0.098                                   | not sign.    | not sign.     | 0.649                             | 2.439  | <b><math>1.47 \times 10^{-2}</math></b> | <b>0.209</b> | <b>weak</b> | 0.041                             | 0.234  | 0.815                                   | not sign.    | not sign.   |
| Neutral White | 0.245                            | 1.062  | 0.288                                   | not sign.    | not sign.     | 0.786                             | 2.860  | <b><math>4.23 \times 10^{-3}</math></b> | <b>0.245</b> | <b>weak</b> | 0.769                             | 2.938  | <b><math>3.30 \times 10^{-3}</math></b> | <b>0.251</b> | <b>weak</b> |
| Color         | 2. China: Women                  |        |                                         |              |               |                                   |        |                                         |              |             | 3. Europe: Men                    |        |                                         |              |             |
|               | 3. Europe: Men, $n$ (2+3) = 101  |        |                                         |              |               | 4. Europe: Women, $n$ (2+4) = 102 |        |                                         |              |             | 4. Europe: Women, $n$ (3+4) = 77  |        |                                         |              |             |
|               | $\Delta\bar{x}$                  | $z$    | $p$ (asym.)                             | $r$          | level         | $\Delta\bar{x}$                   | $z$    | $p$ (asym.)                             | $r$          | level       | $\Delta\bar{x}$                   | $z$    | $p$ (asym.)                             | $r$          | level       |
| Red           | -0.243                           | -0.985 | 0.325                                   | not sign.    | not sign.     | 0.117                             | 0.910  | 0.363                                   | not sign.    | not sign.   | 0.360                             | 1.657  | 0.097                                   | not sign.    | not sign.   |
| Orange        | -0.376                           | -1.315 | 0.188                                   | not sign.    | not sign.     | 0.164                             | 0.743  | 0.457                                   | not sign.    | not sign.   | 0.539                             | 1.640  | 0.101                                   | not sign.    | not sign.   |
| Yellow        | -0.423                           | -1.584 | 0.113                                   | not sign.    | not sign.     | -0.317                            | -1.094 | 0.274                                   | not sign.    | not sign.   | 0.105                             | 0.206  | 0.837                                   | not sign.    | not sign.   |
| Green         | -0.317                           | -1.111 | 0.266                                   | not sign.    | not sign.     | -0.061                            | -0.170 | 0.865                                   | not sign.    | not sign.   | 0.256                             | 0.722  | 0.470                                   | not sign.    | not sign.   |
| Cyan          | -0.549                           | -1.886 | 0.059                                   | not sign.    | not sign.     | -0.696                            | -2.504 | <b><math>1.23 \times 10^{-2}</math></b> | <b>0.248</b> | <b>weak</b> | -0.147                            | -0.376 | 0.707                                   | not sign.    | not sign.   |
| Blue          | -0.548                           | -1.854 | 0.064                                   | not sign.    | not sign.     | 0.106                             | 0.321  | 0.748                                   | not sign.    | not sign.   | 0.654                             | 1.587  | 0.112                                   | not sign.    | not sign.   |
| Purple        | -0.198                           | -0.564 | 0.572                                   | not sign.    | not sign.     | -0.437                            | -1.430 | 0.153                                   | not sign.    | not sign.   | -0.240                            | -0.728 | 0.467                                   | not sign.    | not sign.   |
| Cold White    | 0.492                            | 2.076  | <b><math>3.79 \times 10^{-2}</math></b> | <b>0.207</b> | <b>weak</b>   | 0.466                             | 2.072  | <b><math>3.83 \times 10^{-2}</math></b> | <b>0.205</b> | <b>weak</b> | -0.026                            | 0.171  | 0.865                                   | not sign.    | not sign.   |
| Warm White    | 1.028                            | 3.456  | <b><math>5.48 \times 10^{-4}</math></b> | <b>0.344</b> | <b>medium</b> | 0.420                             | 1.416  | 0.157                                   | not sign.    | not sign.   | -0.608                            | -1.699 | 0.089                                   | not sign.    | not sign.   |
| Neutral White | 0.541                            | 1.994  | <b><math>4.62 \times 10^{-2}</math></b> | <b>0.198</b> | <b>weak</b>   | 0.524                             | 1.982  | <b><math>4.75 \times 10^{-2}</math></b> | <b>0.196</b> | <b>weak</b> | -0.018                            | 0.240  | 0.810                                   | not sign.    | not sign.   |

Color-mood relation: Joy, Part 2

**Table S2.** Statistical evaluation of the four identified groups, differences of the mean values  $\Delta\bar{x}$ , z-score, probability value  $p$ , effect power  $r$  and quantification of it. If  $p < 0.05$ , it is bold marked. Participants for each group are summed up in the first column.

| Participants                 | 1. Contra (red)           |        |                                         |              |               |                             |        |                                         |              |               | 4. Medium (warm–neutral w.) |        |                                         |              |               |
|------------------------------|---------------------------|--------|-----------------------------------------|--------------|---------------|-----------------------------|--------|-----------------------------------------|--------------|---------------|-----------------------------|--------|-----------------------------------------|--------------|---------------|
|                              | 2. Medium (orange–purple) |        |                                         |              |               | 3. Contra (cold w.)         |        |                                         |              |               | level                       | level  | level                                   | level        | level         |
|                              | $\Delta\bar{x}$           | $z$    | $p$ (asym.)                             | $r$          | level         | $\Delta\bar{x}$             | $z$    | $p$ (asym.)                             | $r$          | level         |                             |        |                                         |              |               |
| China:<br>Men<br>$n = 98$    | –0.468                    | –2.916 | <b><math>3.54 \times 10^{-3}</math></b> | <b>0.295</b> | <b>medium</b> | 0.031                       | 0.129  | 0.898                                   | not sign.    | not sign.     | –0.500                      | –2.551 | <b><math>1.08 \times 10^{-2}</math></b> | <b>0.258</b> | <b>medium</b> |
| China:<br>Women<br>$n = 63$  | –0.881                    | –4.723 | <b><math>2.32 \times 10^{-6}</math></b> | <b>0.595</b> | <b>strong</b> | –0.683                      | –2.656 | <b><math>7.91 \times 10^{-3}</math></b> | <b>0.335</b> | <b>medium</b> | –1.278                      | –4.497 | <b><math>6.89 \times 10^{-6}</math></b> | <b>0.567</b> | <b>strong</b> |
| Europe:<br>Men<br>$n = 38$   | –1.039                    | –3.737 | <b><math>1.86 \times 10^{-4}</math></b> | <b>0.606</b> | <b>strong</b> | 0.053                       | 0.090  | 0.928                                   | not sign.    | not sign.     | –0.250                      | –1.006 | 0.314                                   | not sign.    | not sign.     |
| Europe:<br>Women<br>$n = 39$ | –1.205                    | –4.455 | <b><math>8.40 \times 10^{-6}</math></b> | <b>0.713</b> | <b>strong</b> | –0.333                      | –1.214 | 0.225                                   | not sign.    | not sign.     | –0.923                      | –2.684 | <b><math>7.28 \times 10^{-3}</math></b> | <b>0.430</b> | <b>strong</b> |
| Participants                 | 2. Medium (orange–purple) |        |                                         |              |               |                             |        |                                         |              |               | 3. Contra (cold w.)         |        |                                         |              |               |
|                              | 3. Contra (cold w.)       |        |                                         |              |               | 4. Medium (warm–neutral w.) |        |                                         |              |               | 4. Medium (warm–neutral w.) |        |                                         |              |               |
|                              | $\Delta\bar{x}$           | $z$    | $p$ (asym.)                             | $r$          | level         | $\Delta\bar{x}$             | $z$    | $p$ (asym.)                             | $r$          | level         | $\Delta\bar{x}$             | $z$    | $p$ (asym.)                             | $r$          | level         |
| China:<br>Men<br>$n = 98$    | 0.498                     | 3.277  | <b><math>1.05 \times 10^{-3}</math></b> | <b>0.331</b> | <b>medium</b> | –0.032                      | –0.299 | 0.765                                   | not sign.    | not sign.     | –0.531                      | –4.038 | <b><math>5.39 \times 10^{-5}</math></b> | <b>0.408</b> | <b>strong</b> |
| China:<br>Women<br>$n = 63$  | 0.198                     | 1.064  | 0.287                                   | not sign.    | not sign.     | –0.397                      | –2.044 | <b><math>4.09 \times 10^{-2}</math></b> | <b>0.258</b> | <b>medium</b> | –0.595                      | –3.738 | <b><math>1.86 \times 10^{-4}</math></b> | <b>0.471</b> | <b>strong</b> |
| Europe:<br>Men<br>$n = 38$   | 1.092                     | 3.970  | <b><math>7.18 \times 10^{-5}</math></b> | <b>0.644</b> | <b>strong</b> | 0.789                       | 3.404  | <b><math>6.64 \times 10^{-4}</math></b> | <b>0.552</b> | <b>strong</b> | –0.303                      | –1.714 | 0.087                                   | not sign.    | not sign.     |
| Europe:<br>Women<br>$n = 39$ | 0.872                     | 3.044  | <b><math>2.34 \times 10^{-3}</math></b> | <b>0.487</b> | <b>strong</b> | 0.282                       | 1.110  | 0.267                                   | not sign.    | not sign.     | –0.590                      | –3.839 | <b><math>1.23 \times 10^{-4}</math></b> | <b>0.615</b> | <b>strong</b> |

Color-mood relation: Fatigue, Part 1

**Table S3.** Statistical evaluation of the color-fatigue rating, differences of the mean values  $\Delta\bar{x}$ , z-score, probability value  $p$ , effect power  $r$  and quantification of it. If  $p < 0.05$ , it is bold marked. Participants for each group are summed up in the heading.

| Color         | 1. China: Men                    |        |                       |              |             |                                   |        |                       |              |               |                                   |        |                       |              |               |
|---------------|----------------------------------|--------|-----------------------|--------------|-------------|-----------------------------------|--------|-----------------------|--------------|---------------|-----------------------------------|--------|-----------------------|--------------|---------------|
|               | 2. China: Women, $n$ (1+2) = 161 |        |                       |              |             | 3. Europe: Men, $n$ (1+3) = 136   |        |                       |              |               | 4. Europe: Women, $n$ (1+4) = 137 |        |                       |              |               |
|               | $\Delta\bar{x}$                  | $z$    | $p$ (asym.)           | $r$          | level       | $\Delta\bar{x}$                   | $z$    | $p$ (asym.)           | $r$          | level         | $\Delta\bar{x}$                   | $z$    | $p$ (asym.)           | $r$          | level         |
| Red           | -0.372                           | -1.477 | 0.140                 | not sign.    | not sign.   | 0.409                             | 1.370  | 0.171                 | not sign.    | not sign.     | 1.195                             | 4.000  | $6.33 \times 10^{-5}$ | <b>0.342</b> | <b>medium</b> |
| Orange        | 0.227                            | 1.036  | 0.300                 | not sign.    | not sign.   | 0.430                             | 1.697  | 0.090                 | not sign.    | not sign.     | 0.980                             | 3.948  | $7.87 \times 10^{-5}$ | <b>0.337</b> | <b>medium</b> |
| Yellow        | 0.240                            | 1.138  | 0.255                 | not sign.    | not sign.   | 0.439                             | 1.546  | 0.122                 | not sign.    | not sign.     | 0.836                             | 3.368  | $7.56 \times 10^{-4}$ | <b>0.288</b> | <b>weak</b>   |
| Green         | 0.079                            | 0.482  | 0.629                 | not sign.    | not sign.   | 0.338                             | 1.791  | 0.073                 | not sign.    | not sign.     | 0.516                             | 2.262  | $2.37 \times 10^{-2}$ | <b>0.193</b> | <b>weak</b>   |
| Cyan          | 0.035                            | 0.095  | 0.924                 | not sign.    | not sign.   | 0.532                             | 2.575  | $1.00 \times 10^{-2}$ | <b>0.221</b> | <b>weak</b>   | 0.685                             | 3.091  | $2.00 \times 10^{-3}$ | <b>0.264</b> | <b>weak</b>   |
| Blue          | 0.203                            | 1.169  | 0.242                 | not sign.    | not sign.   | 0.118                             | 1.053  | 0.292                 | not sign.    | not sign.     | -0.062                            | -0.328 | 0.743                 | not sign.    | not sign.     |
| Purple        | 0.016                            | -0.030 | 0.976                 | not sign.    | not sign.   | 0.071                             | 0.125  | 0.901                 | not sign.    | not sign.     | 0.418                             | 1.418  | 0.156                 | not sign.    | not sign.     |
| Cold White    | 0.231                            | 1.024  | 0.306                 | not sign.    | not sign.   | 0.718                             | 3.257  | $1.13 \times 10^{-3}$ | <b>0.279</b> | <b>weak</b>   | 0.740                             | 3.258  | $1.12 \times 10^{-3}$ | <b>0.278</b> | <b>weak</b>   |
| Warm White    | 0.421                            | 1.850  | 0.064                 | not sign.    | not sign.   | -0.226                            | -0.921 | 0.357                 | not sign.    | not sign.     | 0.258                             | 1.046  | 0.295                 | not sign.    | not sign.     |
| Neutral White | 0.195                            | 0.935  | 0.350                 | not sign.    | not sign.   | 0.186                             | 0.991  | 0.322                 | not sign.    | not sign.     | 0.475                             | 1.984  | $4.73 \times 10^{-2}$ | <b>0.169</b> | <b>weak</b>   |
| Color         | 2. China: Women                  |        |                       |              |             |                                   |        |                       |              |               |                                   |        |                       |              |               |
|               | 3. Europe: Men, $n$ (2+3) = 101  |        |                       |              |             | 4. Europe: Women, $n$ (2+4) = 102 |        |                       |              |               | 4. Europe: Women, $n$ (3+4) = 77  |        |                       |              |               |
|               | $\Delta\bar{x}$                  | $z$    | $p$ (asym.)           | $r$          | level       | $\Delta\bar{x}$                   | $z$    | $p$ (asym.)           | $r$          | level         | $\Delta\bar{x}$                   | $z$    | $p$ (asym.)           | $r$          | level         |
| Red           | 0.781                            | 2.438  | $1.48 \times 10^{-2}$ | <b>0.243</b> | <b>weak</b> | 1.567                             | 4.784  | $1.72 \times 10^{-6}$ | <b>0.474</b> | <b>medium</b> | 0.785                             | 2.330  | $1.98 \times 10^{-2}$ | <b>0.266</b> | <b>medium</b> |
| Orange        | 0.203                            | 0.826  | 0.409                 | not sign.    | not sign.   | 0.753                             | 3.050  | $2.29 \times 10^{-3}$ | <b>0.302</b> | <b>medium</b> | 0.550                             | 2.105  | $3.53 \times 10^{-2}$ | <b>0.240</b> | <b>medium</b> |
| Yellow        | 0.198                            | 0.570  | 0.569                 | not sign.    | not sign.   | 0.596                             | 2.321  | $2.03 \times 10^{-2}$ | <b>0.230</b> | <b>weak</b>   | 0.397                             | 1.521  | 0.128                 | not sign.    | not sign.     |
| Green         | 0.259                            | 1.414  | 0.157                 | not sign.    | not sign.   | 0.437                             | 1.718  | 0.086                 | not sign.    | not sign.     | 0.178                             | 0.143  | 0.886                 | not sign.    | not sign.     |
| Cyan          | 0.497                            | 2.354  | $1.86 \times 10^{-2}$ | <b>0.234</b> | <b>weak</b> | 0.650                             | 2.836  | $4.57 \times 10^{-3}$ | <b>0.281</b> | <b>weak</b>   | 0.153                             | 0.392  | 0.695                 | not sign.    | not sign.     |
| Blue          | -0.085                           | 0.105  | 0.916                 | not sign.    | not sign.   | -0.265                            | -1.231 | 0.218                 | not sign.    | not sign.     | -0.180                            | -1.060 | 0.289                 | not sign.    | not sign.     |
| Purple        | 0.056                            | 0.101  | 0.919                 | not sign.    | not sign.   | 0.402                             | 1.386  | 0.166                 | not sign.    | not sign.     | 0.346                             | 1.156  | 0.248                 | not sign.    | not sign.     |
| Cold White    | 0.486                            | 2.341  | $1.92 \times 10^{-2}$ | <b>0.233</b> | <b>weak</b> | 0.509                             | 2.290  | $2.20 \times 10^{-2}$ | <b>0.227</b> | <b>weak</b>   | 0.023                             | -0.270 | 0.787                 | not sign.    | not sign.     |
| Warm White    | -0.646                           | -2.385 | $1.71 \times 10^{-2}$ | <b>0.237</b> | <b>weak</b> | -0.162                            | -0.439 | 0.661                 | not sign.    | not sign.     | 0.484                             | 1.654  | 0.098                 | not sign.    | not sign.     |
| Neutral White | -0.009                           | 0.195  | 0.846                 | not sign.    | not sign.   | 0.280                             | 1.082  | 0.279                 | not sign.    | not sign.     | 0.289                             | 0.711  | 0.477                 | not sign.    | not sign.     |

Color-mood relation: Fatigue, Part 2

**Table S4.** Statistical evaluation of the three identified groups, differences of the mean values  $\Delta\bar{x}$ , z-score, probability value  $p$ , effect power  $r$  and quantification of it. If  $p < 0.05$ , it is bold marked. Participants for each group are summed up in the first column.

| Participants                 | 1. Medium (red–yellow) |       |                                          |              |               |                               |        |                                         |              |               | 2. Contra (green–blue)        |        |                                         |              |               |
|------------------------------|------------------------|-------|------------------------------------------|--------------|---------------|-------------------------------|--------|-----------------------------------------|--------------|---------------|-------------------------------|--------|-----------------------------------------|--------------|---------------|
|                              | 2. Contra (green–blue) |       |                                          |              |               | 3. Medium (purple–neutral w.) |        |                                         |              |               | 3. Medium (purple–neutral W.) |        |                                         |              |               |
|                              | $\Delta\bar{x}$        | $z$   | $p$ (asym.)                              | $r$          | level         | $\Delta\bar{x}$               | $z$    | $p$ (asym.)                             | $r$          | level         | $\Delta\bar{x}$               | $z$    | $p$ (asym.)                             | $r$          | level         |
| China:<br>Men<br>$n = 98$    | 0.667                  | 4.847 | <b><math>1.252 \times 10^{-6}</math></b> | <b>0.490</b> | <b>strong</b> | 0.384                         | 2.574  | <b><math>1.01 \times 10^{-2}</math></b> | <b>0.260</b> | <b>medium</b> | –0.283                        | –1.989 | <b><math>4.67 \times 10^{-2}</math></b> | <b>0.201</b> | <b>weak</b>   |
| China:<br>Women<br>$n = 63$  | 0.741                  | 4.599 | <b><math>4.240 \times 10^{-6}</math></b> | <b>0.579</b> | <b>strong</b> | 0.567                         | 3.348  | <b><math>8.14 \times 10^{-4}</math></b> | <b>0.422</b> | <b>strong</b> | –0.173                        | –1.270 | 0.204                                   | not sign.    | not sign.     |
| Europe:<br>Men<br>$n = 38$   | 0.570                  | 2.612 | <b><math>9.000 \times 10^{-3}</math></b> | <b>0.424</b> | <b>strong</b> | 0.145                         | 0.896  | 0.370                                   | not sign.    | not sign.     | –0.425                        | –2.788 | <b><math>5.31 \times 10^{-3}</math></b> | <b>0.452</b> | <b>strong</b> |
| Europe:<br>Women<br>$n = 39$ | 0.043                  | 0.243 | 0.808                                    | not sign.    | not sign.     | –0.147                        | –0.107 | 0.915                                   | not sign.    | not sign.     | –0.190                        | –1.078 | 0.281                                   | not sign.    | not sign.     |

Color-mood relation: Attention, Part 1

**Table S5.** Statistical evaluation of the color-attention rating, differences of the mean values  $\Delta\bar{x}$ , z-score, probability value  $p$ , effect power  $r$  and quantification of it. If  $p < 0.05$ , it is bold marked. Participants for each group are summed up in the heading.

| Color         | 1. China: Men                    |        |                                         |              |               |                                   |        |                                         |              |               |                                   |        |                                         |              |               |
|---------------|----------------------------------|--------|-----------------------------------------|--------------|---------------|-----------------------------------|--------|-----------------------------------------|--------------|---------------|-----------------------------------|--------|-----------------------------------------|--------------|---------------|
|               | 2. China: Women, $n$ (1+2) = 161 |        |                                         |              |               | 3. Europe: Men, $n$ (1+3) = 136   |        |                                         |              |               | 4. Europe: Women, $n$ (1+4) = 137 |        |                                         |              |               |
|               | $\Delta\bar{x}$                  | $z$    | $p$ (asym.)                             | $r$          | level         | $\Delta\bar{x}$                   | $z$    | $p$ (asym.)                             | $r$          | level         | $\Delta\bar{x}$                   | $z$    | $p$ (asym.)                             | $r$          | level         |
| Red           | 0.592                            | 2.171  | <b><math>3.00 \times 10^{-2}</math></b> | <b>0.171</b> | <b>weak</b>   | -1.062                            | -3.855 | <b><math>1.16 \times 10^{-4}</math></b> | <b>0.331</b> | <b>medium</b> | -0.848                            | -2.918 | <b><math>3.53 \times 10^{-3}</math></b> | <b>0.249</b> | <b>weak</b>   |
| Orange        | 0.440                            | 2.014  | <b><math>4.40 \times 10^{-2}</math></b> | <b>0.159</b> | <b>weak</b>   | -0.430                            | -1.695 | 0.090                                   | not sign.    | not sign.     | -0.672                            | -2.679 | <b><math>7.38 \times 10^{-3}</math></b> | <b>0.229</b> | <b>weak</b>   |
| Yellow        | 0.480                            | 2.267  | <b><math>2.34 \times 10^{-2}</math></b> | <b>0.179</b> | <b>weak</b>   | -0.039                            | -0.170 | 0.865                                   | not sign.    | not sign.     | -0.015                            | -0.027 | 0.979                                   | not sign.    | not sign.     |
| Green         | -0.042                           | -0.105 | 0.917                                   | not sign.    | not sign.     | 0.294                             | 1.219  | 0.223                                   | not sign.    | not sign.     | -0.025                            | 0.054  | 0.957                                   | not sign.    | not sign.     |
| Cyan          | -0.104                           | -0.434 | 0.664                                   | not sign.    | not sign.     | 0.079                             | 0.341  | 0.733                                   | not sign.    | not sign.     | 0.406                             | 1.569  | 0.117                                   | not sign.    | not sign.     |
| Blue          | -0.200                           | -0.914 | 0.361                                   | not sign.    | not sign.     | 0.046                             | 0.157  | 0.875                                   | not sign.    | not sign.     | 0.978                             | 3.507  | <b><math>4.53 \times 10^{-4}</math></b> | <b>0.300</b> | <b>medium</b> |
| Purple        | 0.424                            | 1.837  | 0.066                                   | not sign.    | not sign.     | 0.438                             | 1.653  | 0.098                                   | not sign.    | not sign.     | 0.687                             | 2.553  | <b><math>1.07 \times 10^{-2}</math></b> | <b>0.218</b> | <b>weak</b>   |
| Cold White    | -0.002                           | 0.269  | 0.788                                   | not sign.    | not sign.     | 0.490                             | 2.287  | <b><math>2.22 \times 10^{-2}</math></b> | <b>0.196</b> | <b>weak</b>   | 0.464                             | 4.229  | <b><math>2.35 \times 10^{-5}</math></b> | <b>0.361</b> | <b>medium</b> |
| Warm White    | -0.379                           | -1.082 | 0.279                                   | not sign.    | not sign.     | 0.649                             | 4.753  | <b><math>2.00 \times 10^{-6}</math></b> | <b>0.408</b> | <b>medium</b> | 0.041                             | 5.030  | <b><math>4.89 \times 10^{-7}</math></b> | <b>0.430</b> | <b>medium</b> |
| Neutral White | 0.245                            | -0.237 | 0.813                                   | not sign.    | not sign.     | 0.786                             | 3.203  | <b><math>1.36 \times 10^{-3}</math></b> | <b>0.275</b> | <b>weak</b>   | 0.769                             | 4.791  | <b><math>1.66 \times 10^{-6}</math></b> | <b>0.409</b> | <b>medium</b> |
| Color         | 2. China: Women                  |        |                                         |              |               |                                   |        |                                         |              |               | 3. Europe: Men                    |        |                                         |              |               |
|               | 3. Europe: Men, $n$ (2+3) = 101  |        |                                         |              |               | 4. Europe: Women, $n$ (2+4) = 102 |        |                                         |              |               | 4. Europe: Women, $n$ (3+4) = 77  |        |                                         |              |               |
|               | $\Delta\bar{x}$                  | $z$    | $p$ (asym.)                             | $r$          | level         | $\Delta\bar{x}$                   | $z$    | $p$ (asym.)                             | $r$          | level         | $\Delta\bar{x}$                   | $z$    | $p$ (asym.)                             | $r$          | level         |
| Red           | -1.654                           | -4.869 | <b><math>1.12 \times 10^{-6}</math></b> | <b>0.484</b> | <b>medium</b> | -1.440                            | -4.232 | <b><math>2.32 \times 10^{-5}</math></b> | <b>0.419</b> | <b>medium</b> | 0.215                             | 1.184  | 0.237                                   | not sign.    | not sign.     |
| Orange        | -0.870                           | -3.052 | <b><math>2.27 \times 10^{-3}</math></b> | <b>0.304</b> | <b>medium</b> | -1.112                            | -3.799 | <b><math>1.45 \times 10^{-4}</math></b> | <b>0.376</b> | <b>medium</b> | -0.242                            | -1.039 | 0.299                                   | not sign.    | not sign.     |
| Yellow        | -0.519                           | -2.038 | <b><math>4.15 \times 10^{-2}</math></b> | <b>0.203</b> | <b>weak</b>   | -0.495                            | -1.598 | 0.110                                   | not sign.    | not sign.     | 0.024                             | 0.052  | 0.958                                   | not sign.    | not sign.     |
| Green         | 0.336                            | 1.089  | 0.276                                   | not sign.    | not sign.     | 0.017                             | 0.081  | 0.935                                   | not sign.    | not sign.     | -0.319                            | -0.773 | 0.439                                   | not sign.    | not sign.     |
| Cyan          | 0.184                            | 0.626  | 0.531                                   | not sign.    | not sign.     | 0.510                             | 1.780  | 0.075                                   | not sign.    | not sign.     | 0.327                             | 1.055  | 0.292                                   | not sign.    | not sign.     |
| Blue          | 0.245                            | 0.762  | 0.446                                   | not sign.    | not sign.     | 1.177                             | 3.583  | <b><math>3.40 \times 10^{-4}</math></b> | <b>0.355</b> | <b>medium</b> | 0.932                             | 2.633  | <b><math>8.45 \times 10^{-3}</math></b> | <b>0.300</b> | <b>medium</b> |
| Purple        | 0.014                            | 0.022  | 0.983                                   | not sign.    | not sign.     | 0.263                             | 0.881  | 0.378                                   | not sign.    | not sign.     | 0.248                             | 0.762  | 0.446                                   | not sign.    | not sign.     |
| Cold White    | 0.492                            | 1.973  | <b><math>4.85 \times 10^{-2}</math></b> | <b>0.196</b> | <b>weak</b>   | 0.466                             | 3.841  | <b><math>1.23 \times 10^{-4}</math></b> | <b>0.380</b> | <b>medium</b> | -0.026                            | 1.751  | 0.080                                   | not sign.    | not sign.     |
| Warm White    | 1.028                            | 4.763  | <b><math>1.91 \times 10^{-6}</math></b> | <b>0.474</b> | <b>medium</b> | 0.420                             | 5.063  | <b><math>4.13 \times 10^{-7}</math></b> | <b>0.501</b> | <b>strong</b> | -0.608                            | 0.265  | 0.791                                   | not sign.    | not sign.     |
| Neutral White | 0.541                            | 2.956  | <b><math>3.11 \times 10^{-3}</math></b> | <b>0.294</b> | <b>weak</b>   | 0.524                             | 4.284  | <b><math>1.83 \times 10^{-5}</math></b> | <b>0.424</b> | <b>medium</b> | -0.018                            | 1.681  | 0.093                                   | not sign.    | not sign.     |

Color-mood relation: Attention, Part 2

**Table S6.** Statistical evaluation of the three identified groups, differences of the mean values  $\Delta\bar{x}$ , z-score, probability value  $p$ , effect power  $r$  and quantification of it. If  $p < 0.05$ , it is bold marked. Participants for each group are summed up in the first column.

| Participants                 | 1. Medium–High (red–orange) |        |                                         |              |               | 2. Medium (yellow–purple)              |        |                                         |              |               | 3. Medium–Contra (cold w. –neutral w.) |        |                                         |              |               |
|------------------------------|-----------------------------|--------|-----------------------------------------|--------------|---------------|----------------------------------------|--------|-----------------------------------------|--------------|---------------|----------------------------------------|--------|-----------------------------------------|--------------|---------------|
|                              | 2. Medium (yellow–purple)   |        |                                         |              |               | 3. Medium–Contra (cold w. –neutral w.) |        |                                         |              |               | 3. Medium–Contra (cold w. –neutral w.) |        |                                         |              |               |
|                              | $\Delta\bar{x}$             | $z$    | $p$ (asym.)                             | $r$          | level         | $\Delta\bar{x}$                        | $z$    | $p$ (asym.)                             | $r$          | level         | $\Delta\bar{x}$                        | $z$    | $p$ (asym.)                             | $r$          | level         |
| China:<br>Men<br>$n = 98$    | 0.198                       | 1.760  | 0.078                                   | not sign.    | not sign.     | 0.340                                  | 1.890  | 0.059                                   | not sign.    | not sign.     | 0.142                                  | 1.037  | 0.299                                   | not sign.    | not sign.     |
| China:<br>Women<br>$n = 63$  | –0.206                      | –1.151 | 0.250                                   | not sign.    | not sign.     | –0.270                                 | –0.896 | 0.370                                   | not sign.    | not sign.     | –0.063                                 | –0.449 | 0.653                                   | not sign.    | not sign.     |
| Europe:<br>Men<br>$n = 38$   | 1.108                       | 3.672  | <b><math>2.41 \times 10^{-4}</math></b> | <b>0.596</b> | <b>strong</b> | 1.969                                  | 4.556  | <b><math>5.22 \times 10^{-6}</math></b> | <b>0.739</b> | <b>strong</b> | 0.861                                  | 4.128  | <b><math>3.66 \times 10^{-5}</math></b> | <b>0.670</b> | <b>strong</b> |
| Europe:<br>Women<br>$n = 39$ | 1.364                       | 4.286  | <b><math>1.82 \times 10^{-5}</math></b> | <b>0.686</b> | <b>strong</b> | 2.308                                  | 4.900  | <b><math>9.57 \times 10^{-7}</math></b> | <b>0.785</b> | <b>strong</b> | 0.944                                  | 4.377  | <b><math>1.20 \times 10^{-5}</math></b> | <b>0.701</b> | <b>strong</b> |

Color-mood relation: Relax, Part 1

**Table S7.** Statistical evaluation of the color-relax rating, differences of the mean values  $\Delta\bar{x}$ , z-score, probability value  $p$ , effect power  $r$  and quantification of it. If  $p < 0.05$ , it is bold marked. Participants for each group are summed up in the heading.

| Color         | 1. China: Men                    |        |                                         |              |             |                                   |        |                                         |              |               |                                   |        |                                         |              |               |
|---------------|----------------------------------|--------|-----------------------------------------|--------------|-------------|-----------------------------------|--------|-----------------------------------------|--------------|---------------|-----------------------------------|--------|-----------------------------------------|--------------|---------------|
|               | 2. China: Women, $n$ (1+2) = 161 |        |                                         |              |             | 3. Europe: Men, $n$ (1+3) = 136   |        |                                         |              |               | 4. Europe: Women, $n$ (1+4) = 137 |        |                                         |              |               |
|               | $\Delta\bar{x}$                  | $z$    | $p$ (asym.)                             | $r$          | level       | $\Delta\bar{x}$                   | $z$    | $p$ (asym.)                             | $r$          | level         | $\Delta\bar{x}$                   | $z$    | $p$ (asym.)                             | $r$          | level         |
| Red           | 0.298                            | 1.614  | 0.106                                   | not sign.    | not sign.   | -0.024                            | -0.384 | 0.701                                   | not sign.    | not sign.     | 0.304                             | 1.715  | 0.086                                   | not sign.    | not sign.     |
| Orange        | 0.266                            | 1.827  | 0.068                                   | not sign.    | not sign.   | -0.416                            | -1.482 | 0.138                                   | not sign.    | not sign.     | 0.321                             | 1.860  | 0.063                                   | not sign.    | not sign.     |
| Yellow        | 0.029                            | 0.372  | 0.710                                   | not sign.    | not sign.   | -0.350                            | -1.346 | 0.178                                   | not sign.    | not sign.     | 0.140                             | 0.712  | 0.476                                   | not sign.    | not sign.     |
| Green         | 0.313                            | 1.276  | 0.202                                   | not sign.    | not sign.   | 0.019                             | 0.050  | 0.960                                   | not sign.    | not sign.     | 0.866                             | 3.302  | <b><math>9.60 \times 10^{-4}</math></b> | <b>0.282</b> | <b>weak</b>   |
| Cyan          | 0.034                            | 0.121  | 0.904                                   | not sign.    | not sign.   | -0.162                            | -0.580 | 0.562                                   | not sign.    | not sign.     | -0.159                            | -0.595 | 0.552                                   | not sign.    | not sign.     |
| Blue          | 0.259                            | 1.050  | 0.294                                   | not sign.    | not sign.   | 0.302                             | 1.032  | 0.302                                   | not sign.    | not sign.     | 0.455                             | 1.365  | 0.172                                   | not sign.    | not sign.     |
| Purple        | 0.408                            | 1.612  | 0.107                                   | not sign.    | not sign.   | 0.389                             | 1.426  | 0.154                                   | not sign.    | not sign.     | 0.149                             | 0.617  | 0.537                                   | not sign.    | not sign.     |
| Cold White    | -0.002                           | -0.866 | 0.386                                   | not sign.    | not sign.   | 0.490                             | 2.218  | <b><math>2.66 \times 10^{-2}</math></b> | <b>0.190</b> | <b>weak</b>   | 0.464                             | 3.196  | <b><math>1.39 \times 10^{-3}</math></b> | <b>0.273</b> | <b>weak</b>   |
| Warm White    | -0.379                           | -1.326 | 0.185                                   | not sign.    | not sign.   | 0.649                             | 1.873  | 0.061                                   | not sign.    | not sign.     | 0.041                             | 0.795  | 0.427                                   | not sign.    | not sign.     |
| Neutral White | 0.245                            | -0.466 | 0.641                                   | not sign.    | not sign.   | 0.786                             | 2.631  | <b><math>8.50 \times 10^{-3}</math></b> | <b>0.226</b> | <b>weak</b>   | 0.769                             | 4.434  | <b><math>9.27 \times 10^{-6}</math></b> | <b>0.379</b> | <b>medium</b> |
| Color         | 2. China: Women                  |        |                                         |              |             |                                   |        |                                         |              |               |                                   |        |                                         |              |               |
|               | 3. Europe: Men, $n$ (2+3) = 101  |        |                                         |              |             | 4. Europe: Women, $n$ (2+4) = 102 |        |                                         |              |               | 4. Europe: Women, $n$ (3+4) = 77  |        |                                         |              |               |
|               | $\Delta\bar{x}$                  | $z$    | $p$ (asym.)                             | $r$          | level       | $\Delta\bar{x}$                   | $z$    | $p$ (asym.)                             | $r$          | level         | $\Delta\bar{x}$                   | $z$    | $p$ (asym.)                             | $r$          | level         |
| Red           | -0.322                           | -1.721 | 0.085                                   | not sign.    | not sign.   | 0.006                             | 0.422  | 0.673                                   | not sign.    | not sign.     | 0.328                             | 1.836  | 0.066                                   | not sign.    | not sign.     |
| Orange        | -0.683                           | -2.551 | <b><math>1.07 \times 10^{-2}</math></b> | <b>0.254</b> | <b>weak</b> | 0.055                             | 0.352  | 0.725                                   | not sign.    | not sign.     | 0.738                             | 2.468  | <b><math>1.36 \times 10^{-2}</math></b> | <b>0.281</b> | <b>weak</b>   |
| Yellow        | -0.379                           | -1.445 | 0.148                                   | not sign.    | not sign.   | 0.110                             | 0.381  | 0.703                                   | not sign.    | not sign.     | 0.490                             | 1.618  | 0.106                                   | not sign.    | not sign.     |
| Green         | -0.295                           | -0.882 | 0.378                                   | not sign.    | not sign.   | 0.553                             | 2.074  | <b><math>3.81 \times 10^{-2}</math></b> | <b>0.205</b> | <b>weak</b>   | 0.848                             | 2.564  | <b><math>1.04 \times 10^{-2}</math></b> | <b>0.292</b> | <b>weak</b>   |
| Cyan          | -0.196                           | -0.596 | 0.551                                   | not sign.    | not sign.   | -0.193                            | -0.621 | 0.535                                   | not sign.    | not sign.     | 0.003                             | 0.000  | 1.000                                   | not sign.    | not sign.     |
| Blue          | 0.042                            | 0.279  | 0.780                                   | not sign.    | not sign.   | 0.196                             | 0.933  | 0.351                                   | not sign.    | not sign.     | 0.153                             | 0.499  | 0.618                                   | not sign.    | not sign.     |
| Purple        | -0.019                           | 0.083  | 0.934                                   | not sign.    | not sign.   | -0.259                            | -0.680 | 0.496                                   | not sign.    | not sign.     | -0.240                            | -0.556 | 0.578                                   | not sign.    | not sign.     |
| Cold White    | 0.492                            | 2.548  | <b><math>1.08 \times 10^{-2}</math></b> | <b>0.254</b> | <b>weak</b> | 0.466                             | 3.459  | <b><math>5.42 \times 10^{-4}</math></b> | <b>0.343</b> | <b>medium</b> | -0.026                            | 0.886  | 0.376                                   | not sign.    | not sign.     |
| Warm White    | 1.028                            | 2.838  | <b><math>4.55 \times 10^{-3}</math></b> | <b>0.282</b> | <b>weak</b> | 0.420                             | 2.135  | <b><math>3.27 \times 10^{-2}</math></b> | <b>0.211</b> | <b>weak</b>   | -0.608                            | -1.273 | 0.203                                   | not sign.    | not sign.     |
| Neutral White | 0.541                            | 2.935  | <b><math>3.33 \times 10^{-3}</math></b> | <b>0.292</b> | <b>weak</b> | 0.524                             | 4.661  | <b><math>3.14 \times 10^{-6}</math></b> | <b>0.462</b> | <b>medium</b> | -0.018                            | 1.700  | 0.089                                   | not sign.    | not sign.     |

## Color-mood relation: Relax, Part 2

**Table S8.** Statistical evaluation of the four identified groups, differences of the mean values  $\Delta\bar{x}$ , z-score, probability value  $p$ , effect power  $r$  and quantification of it. If  $p < 0.05$ , it is bold marked. Participants for each group are summed up in the first column.

| Participants                 | 1. Contra (red-orange)  |        |                                          |              |               |                                     |          |                                         |              |               |                                     |        |                                          |              |               |
|------------------------------|-------------------------|--------|------------------------------------------|--------------|---------------|-------------------------------------|----------|-----------------------------------------|--------------|---------------|-------------------------------------|--------|------------------------------------------|--------------|---------------|
|                              | 2. Medium (yellow-blue) |        |                                          |              |               | 3. Low (purple-cold w.)             |          |                                         |              |               | 4. Medium-High (warm w.-neutral w.) |        |                                          |              |               |
|                              | $\Delta\bar{x}$         | $z$    | $p$ (asym.)                              | $r$          | level         | $\Delta\bar{x}$                     | $z$      | $p$ (asym.)                             | $r$          | level         | $\Delta\bar{x}$                     | $z$    | $p$ (asym.)                              | $r$          | level         |
| China:<br>Men<br>$n = 98$    | -0.962                  | -6.696 | <b><math>2.15 \times 10^{-11}</math></b> | <b>0.676</b> | <b>strong</b> | -0.816                              | -5.22598 | <b><math>1.73 \times 10^{-7}</math></b> | <b>0.528</b> | <b>strong</b> | -1.332                              | -6.470 | <b><math>9.83 \times 10^{-11}</math></b> | <b>0.654</b> | <b>strong</b> |
| China:<br>Women<br>$n = 63$  | -1.107                  | -5.404 | <b><math>6.53 \times 10^{-8}</math></b>  | <b>0.681</b> | <b>strong</b> | -1.024                              | -4.96276 | <b><math>6.95 \times 10^{-7}</math></b> | <b>0.625</b> | <b>strong</b> | -1.865                              | -5.964 | <b><math>2.46 \times 10^{-9}</math></b>  | <b>0.751</b> | <b>strong</b> |
| Europe:<br>Men<br>$n = 38$   | -0.789                  | -2.840 | <b><math>4.50 \times 10^{-3}</math></b>  | <b>0.461</b> | <b>strong</b> | -0.132                              | -0.524   | 0.600                                   | not sign.    | not sign.     | -0.487                              | -1.653 | 0.098                                    | not sign.    | not sign.     |
| Europe:<br>Women<br>$n = 39$ | -0.949                  | -3.595 | <b><math>3.24 \times 10^{-4}</math></b>  | <b>0.576</b> | <b>strong</b> | -0.667                              | -2.879   | <b><math>3.99 \times 10^{-3}</math></b> | <b>0.461</b> | <b>strong</b> | -0.936                              | -3.051 | <b><math>2.28 \times 10^{-3}</math></b>  | <b>0.488</b> | <b>strong</b> |
| Participants                 | 2. Medium (yellow-blue) |        |                                          |              |               |                                     |          |                                         |              |               | 3. Low (purple-cold w.)             |        |                                          |              |               |
|                              | 3. Low (purple-cold w.) |        |                                          |              |               | 4. Medium-High (warm w.-neutral w.) |          |                                         |              |               | 4. Medium-High (warm w.-neutral w.) |        |                                          |              |               |
|                              | $\Delta\bar{x}$         | $z$    | $p$ (asym.)                              | $r$          | level         | $\Delta\bar{x}$                     | $z$      | $p$ (asym.)                             | $r$          | level         | $\Delta\bar{x}$                     | $z$    | $p$ (asym.)                              | $r$          | level         |
| China:<br>Men<br>$n = 98$    | 0.145                   | 1.738  | 0.082                                    | not sign.    | not sign.     | -0.370                              | -2.440   | <b><math>1.47 \times 10^{-2}</math></b> | <b>0.246</b> | <b>weak</b>   | -0.515                              | -3.597 | <b><math>3.22 \times 10^{-4}</math></b>  | <b>0.363</b> | <b>medium</b> |
| China:<br>Women<br>$n = 63$  | 0.083                   | 0.133  | 0.894                                    | not sign.    | not sign.     | -0.758                              | -3.570   | <b><math>3.57 \times 10^{-4}</math></b> | <b>0.450</b> | <b>strong</b> | -0.841                              | -4.402 | <b><math>1.07 \times 10^{-5}</math></b>  | <b>0.555</b> | <b>strong</b> |
| Europe:<br>Men<br>$n = 38$   | 0.658                   | 2.849  | <b><math>4.39 \times 10^{-3}</math></b>  | <b>0.462</b> | <b>strong</b> | 0.303                               | 1.034    | 0.301                                   | not sign.    | not sign.     | -0.355                              | -1.816 | 0.069                                    | not sign.    | not sign.     |
| Europe:<br>Women<br>$n = 39$ | 0.282                   | 1.384  | 0.166                                    | not sign.    | not sign.     | 0.013                               | 0.063    | 0.950                                   | not sign.    | not sign.     | -0.269                              | -1.221 | 0.222                                    | not sign.    | not sign.     |



## S2: Position-preferences

### Position-preference relation: Second row, Part 1

**Table S1.** Statistical evaluation of the position rating, second row, differences of the mean values  $\Delta\bar{x}$ , z-score, probability value  $p$ , effect power  $r$  and quantification of it. If  $p < 0.05$ , it is bold marked. Participants for each group are summed up in the heading.

| Position | 1. China: Men                    |        |                                         |              |               |                                   |        |                                         |              |               |                                   |        |                                         |              |               |
|----------|----------------------------------|--------|-----------------------------------------|--------------|---------------|-----------------------------------|--------|-----------------------------------------|--------------|---------------|-----------------------------------|--------|-----------------------------------------|--------------|---------------|
|          | 2. China: Women, $n$ (1+2) = 161 |        |                                         |              |               | 3. Europe: Men, $n$ (1+3) = 136   |        |                                         |              |               | 4. Europe: Women, $n$ (1+4) = 137 |        |                                         |              |               |
|          | $\Delta\bar{x}$                  | $z$    | $p$ (asym.)                             | $r$          | level         | $\Delta\bar{x}$                   | $z$    | $p$ (asym.)                             | $r$          | level         | $\Delta\bar{x}$                   | $z$    | $p$ (asym.)                             | $r$          | level         |
| Door     | 0.053                            | 0.520  | 0.603                                   | not sign.    | not sign.     | -0.592                            | -3.588 | <b><math>3.33 \times 10^{-4}</math></b> | <b>0.308</b> | <b>medium</b> | -0.476                            | -3.035 | <b><math>2.41 \times 10^{-3}</math></b> | <b>0.259</b> | <b>weak</b>   |
| Foot     | 0.174                            | 0.782  | 0.434                                   | not sign.    | not sign.     | -0.659                            | -3.937 | <b><math>8.24 \times 10^{-5}</math></b> | <b>0.338</b> | <b>medium</b> | -0.517                            | -3.589 | <b><math>3.33 \times 10^{-4}</math></b> | <b>0.307</b> | <b>medium</b> |
| Seat     | -0.139                           | -0.650 | 0.516                                   | not sign.    | not sign.     | -0.158                            | -0.908 | 0.364                                   | not sign.    | not sign.     | -0.252                            | -1.363 | 0.173                                   | not sign.    | not sign.     |
| Top      | -0.065                           | -0.383 | 0.702                                   | not sign.    | not sign.     | 0.481                             | 1.910  | 0.056                                   | not sign.    | not sign.     | 0.830                             | 3.178  | <b><math>1.48 \times 10^{-3}</math></b> | <b>0.272</b> | <b>weak</b>   |
| A-Pillar | -0.211                           | -1.046 | 0.296                                   | not sign.    | not sign.     | 0.031                             | 0.399  | 0.690                                   | not sign.    | not sign.     | 0.095                             | 0.608  | 0.543                                   | not sign.    | not sign.     |
| Center   | 0.054                            | 0.222  | 0.824                                   | not sign.    | not sign.     | -0.283                            | -1.187 | 0.235                                   | not sign.    | not sign.     | 0.116                             | 0.329  | 0.742                                   | not sign.    | not sign.     |
| Screen   | 0.122                            | 0.396  | 0.692                                   | not sign.    | not sign.     | -0.071                            | -0.311 | 0.756                                   | not sign.    | not sign.     | 0.211                             | 0.853  | 0.393                                   | not sign.    | not sign.     |
| S. Wheel | 0.015                            | -0.117 | 0.907                                   | not sign.    | not sign.     | 0.296                             | 1.932  | 0.053                                   | not sign.    | not sign.     | 0.574                             | 2.804  | <b><math>5.04 \times 10^{-3}</math></b> | <b>0.240</b> | <b>weak</b>   |
| All      | 0.104                            | 0.308  | 0.758                                   | not sign.    | not sign.     | 0.492                             | 2.489  | <b><math>1.28 \times 10^{-2}</math></b> | <b>0.213</b> | <b>weak</b>   | 0.892                             | 4.181  | <b><math>2.91 \times 10^{-5}</math></b> | <b>0.357</b> | <b>medium</b> |
| Position | 2. China: Women                  |        |                                         |              |               |                                   |        |                                         |              |               | 3. Europe: Men                    |        |                                         |              |               |
|          | 3. Europe: Men, $n$ (2+3) = 101  |        |                                         |              |               | 4. Europe: Women, $n$ (2+4) = 102 |        |                                         |              |               | 4. Europe: Women, $n$ (3+4) = 77  |        |                                         |              |               |
|          | $\Delta\bar{x}$                  | $z$    | $p$ (asym.)                             | $r$          | level         | $\Delta\bar{x}$                   | $z$    | $p$ (asym.)                             | $r$          | level         | $\Delta\bar{x}$                   | $z$    | $p$ (asym.)                             | $r$          | level         |
| Door     | -0.645                           | -3.806 | <b><math>1.41 \times 10^{-4}</math></b> | <b>0.379</b> | <b>medium</b> | -0.530                            | -3.226 | <b><math>1.25 \times 10^{-3}</math></b> | <b>0.319</b> | <b>medium</b> | 0.115                             | 0.331  | 0.741                                   | not sign.    | not sign.     |
| Foot     | -0.833                           | -4.022 | <b><math>5.78 \times 10^{-5}</math></b> | <b>0.400</b> | <b>medium</b> | -0.691                            | -3.662 | <b><math>2.50 \times 10^{-4}</math></b> | <b>0.363</b> | <b>medium</b> | 0.142                             | 0.102  | 0.919                                   | not sign.    | not sign.     |
| Seat     | -0.020                           | -0.385 | 0.700                                   | not sign.    | not sign.     | -0.113                            | -0.835 | 0.404                                   | not sign.    | not sign.     | -0.094                            | -0.368 | 0.713                                   | not sign.    | not sign.     |
| Top      | 0.546                            | 2.156  | <b><math>3.11 \times 10^{-2}</math></b> | <b>0.215</b> | <b>weak</b>   | 0.895                             | 3.393  | <b><math>6.90 \times 10^{-4}</math></b> | <b>0.336</b> | <b>medium</b> | 0.350                             | 1.226  | 0.220                                   | not sign.    | not sign.     |
| A-Pillar | 0.242                            | 1.049  | 0.294                                   | not sign.    | not sign.     | 0.306                             | 1.270  | 0.204                                   | not sign.    | not sign.     | 0.064                             | 0.168  | 0.866                                   | not sign.    | not sign.     |
| Center   | -0.337                           | -1.306 | 0.192                                   | not sign.    | not sign.     | 0.062                             | 0.175  | 0.861                                   | not sign.    | not sign.     | 0.399                             | 1.216  | 0.224                                   | not sign.    | not sign.     |
| Screen   | -0.194                           | -0.593 | 0.553                                   | not sign.    | not sign.     | 0.089                             | 0.480  | 0.631                                   | not sign.    | not sign.     | 0.282                             | 0.954  | 0.340                                   | not sign.    | not sign.     |
| S. Wheel | 0.281                            | 1.988  | <b><math>4.68 \times 10^{-2}</math></b> | <b>0.198</b> | <b>weak</b>   | 0.558                             | 2.824  | <b><math>4.74 \times 10^{-3}</math></b> | <b>0.280</b> | <b>weak</b>   | 0.277                             | 0.565  | 0.572                                   | not sign.    | not sign.     |
| All      | 0.389                            | 2.290  | <b><math>2.20 \times 10^{-2}</math></b> | <b>0.228</b> | <b>weak</b>   | 0.788                             | 3.992  | <b><math>6.55 \times 10^{-5}</math></b> | <b>0.395</b> | <b>medium</b> | 0.399                             | 1.359  | 0.174                                   | not sign.    | not sign.     |

Position-preference relation: Second row, Part 2

**Table S2.** Statistical evaluation of the four identified groups, differences of the mean values  $\Delta\bar{x}$ , z-score, probability value  $p$ , effect power  $r$  and quantification of it. If  $p < 0.05$ , it is bold marked. Participants for each group are summed up in the first column.

| Participants                 | 1. High (door-foot)            |        |                        |              |               |                                |       |                        |              |               |                                |       |                        |              |               |
|------------------------------|--------------------------------|--------|------------------------|--------------|---------------|--------------------------------|-------|------------------------|--------------|---------------|--------------------------------|-------|------------------------|--------------|---------------|
|                              | 2. Medium (seat-a-pillar)      |        |                        |              |               | 3. Medium-High (center-screen) |       |                        |              |               | 4. Contra (s.wheel-all)        |       |                        |              |               |
|                              | $\Delta\bar{x}$                | $z$    | $p$ (asym.)            | $r$          | level         | $\Delta\bar{x}$                | $z$   | $p$ (asym.)            | $r$          | level         | $\Delta\bar{x}$                | $z$   | $p$ (asym.)            | $r$          | level         |
| China:<br>Men<br>$n = 98$    | 0.946                          | 6.841  | $7.85 \times 10^{-12}$ | <b>0.691</b> | <b>strong</b> | 0.776                          | 5.529 | $3.21 \times 10^{-8}$  | <b>0.559</b> | <b>strong</b> | 1.796                          | 7.978 | $1.55 \times 10^{-15}$ | <b>0.806</b> | <b>strong</b> |
| China:<br>Women<br>$n = 63$  | 0.696                          | 4.854  | $1.21 \times 10^{-6}$  | <b>0.612</b> | <b>strong</b> | 0.714                          | 4.063 | $4.84 \times 10^{-5}$  | <b>0.512</b> | <b>strong</b> | 1.746                          | 6.436 | $1.22 \times 10^{-10}$ | <b>0.811</b> | <b>strong</b> |
| Europe:<br>Men<br>$n = 38$   | 1.689                          | 5.170  | $2.34 \times 10^{-7}$  | <b>0.839</b> | <b>medium</b> | 1.224                          | 4.527 | $5.99 \times 10^{-6}$  | <b>0.734</b> | <b>strong</b> | 2.816                          | 5.238 | $1.63 \times 10^{-7}$  | <b>0.850</b> | <b>strong</b> |
| Europe:<br>Women<br>$n = 39$ | 1.667                          | 5.222  | $1.77 \times 10^{-7}$  | <b>0.836</b> | <b>medium</b> | 1.436                          | 4.350 | $1.36 \times 10^{-5}$  | <b>0.697</b> | <b>strong</b> | 3.026                          | 5.330 | $9.84 \times 10^{-8}$  | <b>0.853</b> | <b>strong</b> |
| Participants                 | 2. Medium (seat-a-pillar)      |        |                        |              |               |                                |       |                        |              |               | 3. Medium-High (center-screen) |       |                        |              |               |
|                              | 3. Medium-High (center-screen) |        |                        |              |               | 4. Contra (s.wheel-all)        |       |                        |              |               | 4. Contra (s.wheel-all)        |       |                        |              |               |
|                              | $\Delta\bar{x}$                | $z$    | $p$ (asym.)            | $r$          | level         | $\Delta\bar{x}$                | $z$   | $p$ (asym.)            | $r$          | level         | $\Delta\bar{x}$                | $z$   | $p$ (asym.)            | $r$          | level         |
| China:<br>Men<br>$n = 98$    | -0.170                         | -1.591 | 0.112                  | not sign.    | not sign.     | 0.850                          | 6.551 | $5.70 \times 10^{-11}$ | <b>0.662</b> | <b>strong</b> | 1.020                          | 7.226 | $4.98 \times 10^{-13}$ | <b>0.730</b> | <b>strong</b> |
| China:<br>Women<br>$n = 63$  | 0.019                          | 0.330  | 0.741                  | not sign.    | not sign.     | 1.050                          | 6.063 | $1.33 \times 10^{-9}$  | <b>0.764</b> | <b>strong</b> | 1.032                          | 5.938 | $2.89 \times 10^{-9}$  | <b>0.748</b> | <b>strong</b> |
| Europe:<br>Men<br>$n = 38$   | -0.465                         | -2.114 | $3.45 \times 10^{-2}$  | <b>0.343</b> | <b>medium</b> | 1.127                          | 4.675 | $2.94 \times 10^{-6}$  | <b>0.758</b> | <b>strong</b> | 1.592                          | 5.197 | $2.03 \times 10^{-7}$  | <b>0.843</b> | <b>strong</b> |
| Europe:<br>Women<br>$n = 39$ | -0.231                         | -0.508 | 0.612                  | 0.111        | not sign.     | 1.359                          | 4.913 | $8.97 \times 10^{-7}$  | <b>0.787</b> | <b>strong</b> | 1.590                          | 5.054 | $4.33 \times 10^{-7}$  | <b>0.809</b> | <b>strong</b> |

**Table S3.** Statistical evaluation of the position rating, first row, differences of the mean values  $\Delta\bar{x}$ , z-score, probability value  $p$ , effect power  $r$  and quantification of it. If  $p < 0.05$ , it is bold marked. Participants for each group are summed up in the heading.

| Position | 1. China: Men                    |        |                                         |              |               |                                   |        |                                         |              |               |                                   |        |                                         |              |               |
|----------|----------------------------------|--------|-----------------------------------------|--------------|---------------|-----------------------------------|--------|-----------------------------------------|--------------|---------------|-----------------------------------|--------|-----------------------------------------|--------------|---------------|
|          | 2. China: Women, $n$ (1+2) = 161 |        |                                         |              |               | 3. Europe: Men, $n$ (1+3) = 136   |        |                                         |              |               | 4. Europe: Women, $n$ (1+4) = 137 |        |                                         |              |               |
|          | $\Delta\bar{x}$                  | $z$    | $p$ (asym.)                             | $r$          | level         | $\Delta\bar{x}$                   | $z$    | $p$ (asym.)                             | $r$          | level         | $\Delta\bar{x}$                   | $z$    | $p$ (asym.)                             | $r$          | level         |
| Door     | -0.207                           | -1.114 | 0.265                                   | not sign.    | not sign.     | -0.597                            | -3.508 | <b><math>4.51 \times 10^{-4}</math></b> | <b>0.301</b> | <b>medium</b> | -0.460                            | -2.840 | <b><math>4.52 \times 10^{-3}</math></b> | <b>0.243</b> | <b>weak</b>   |
| Foot     | 0.067                            | 0.569  | 0.570                                   | not sign.    | not sign.     | -0.538                            | -2.912 | <b><math>3.60 \times 10^{-3}</math></b> | <b>0.250</b> | <b>weak</b>   | -0.425                            | -2.831 | <b><math>4.63 \times 10^{-3}</math></b> | <b>0.242</b> | <b>weak</b>   |
| Seat     | -0.059                           | -0.212 | 0.832                                   | not sign.    | not sign.     | -0.003                            | -0.097 | 0.923                                   | not sign.    | not sign.     | -0.001                            | -0.125 | 0.901                                   | not sign.    | not sign.     |
| Top      | -0.016                           | -0.272 | 0.785                                   | not sign.    | not sign.     | 0.569                             | 2.378  | <b><math>1.74 \times 10^{-2}</math></b> | <b>0.204</b> | <b>weak</b>   | 0.704                             | 2.991  | <b><math>2.78 \times 10^{-3}</math></b> | <b>0.256</b> | <b>weak</b>   |
| A-Pillar | -0.161                           | -0.940 | 0.347                                   | not sign.    | not sign.     | 0.493                             | 2.528  | <b><math>1.15 \times 10^{-2}</math></b> | <b>0.217</b> | <b>weak</b>   | -0.023                            | 0.314  | 0.753                                   | not sign.    | not sign.     |
| Center   | 0.162                            | 0.592  | 0.554                                   | not sign.    | not sign.     | 0.187                             | 0.659  | 0.510                                   | not sign.    | not sign.     | 0.005                             | -0.137 | 0.891                                   | not sign.    | not sign.     |
| Screen   | 0.318                            | 1.265  | 0.206                                   | not sign.    | not sign.     | -0.004                            | -0.055 | 0.956                                   | not sign.    | not sign.     | 0.401                             | 1.604  | 0.109                                   | not sign.    | not sign.     |
| S. Wheel | 0.060                            | 0.305  | 0.760                                   | not sign.    | not sign.     | 0.216                             | 1.859  | 0.063                                   | not sign.    | not sign.     | 0.595                             | 3.475  | <b><math>5.11 \times 10^{-4}</math></b> | <b>0.297</b> | <b>weak</b>   |
| All      | 0.307                            | 1.061  | 0.289                                   | not sign.    | not sign.     | 0.766                             | 3.377  | <b><math>7.33 \times 10^{-4}</math></b> | <b>0.290</b> | <b>weak</b>   | 0.979                             | 4.557  | <b><math>5.19 \times 10^{-6}</math></b> | <b>0.389</b> | <b>medium</b> |
| Position | 2. China: Women                  |        |                                         |              |               |                                   |        |                                         |              |               |                                   |        |                                         |              |               |
|          | 3. Europe: Men, $n$ (2+3) = 101  |        |                                         |              |               | 4. Europe: Women, $n$ (2+4) = 102 |        |                                         |              |               | 4. Europe: Women, $n$ (3+4) = 77  |        |                                         |              |               |
|          | $\Delta\bar{x}$                  | $z$    | $p$ (asym.)                             | $r$          | level         | $\Delta\bar{x}$                   | $z$    | $p$ (asym.)                             | $r$          | level         | $\Delta\bar{x}$                   | $z$    | $p$ (asym.)                             | $r$          | level         |
| Door     | -0.390                           | -2.753 | <b><math>5.91 \times 10^{-3}</math></b> | <b>0.274</b> | <b>weak</b>   | -0.254                            | -2.068 | <b><math>3.87 \times 10^{-2}</math></b> | <b>0.205</b> | <b>weak</b>   | 0.137                             | 0.359  | 0.720                                   | not sign.    | not sign.     |
| Foot     | -0.604                           | -3.042 | <b><math>2.35 \times 10^{-3}</math></b> | <b>0.303</b> | <b>medium</b> | -0.492                            | -2.918 | <b><math>3.53 \times 10^{-3}</math></b> | <b>0.289</b> | <b>weak</b>   | 0.113                             | -0.092 | 0.927                                   | not sign.    | not sign.     |
| Seat     | 0.056                            | 0.000  | 1.000                                   | not sign.    | not sign.     | 0.059                             | -0.179 | 0.858                                   | not sign.    | not sign.     | 0.003                             | -0.089 | 0.929                                   | not sign.    | not sign.     |
| Top      | 0.586                            | 2.486  | <b><math>1.29 \times 10^{-2}</math></b> | <b>0.247</b> | <b>weak</b>   | 0.720                             | 3.031  | <b><math>2.44 \times 10^{-3}</math></b> | <b>0.300</b> | <b>medium</b> | 0.134                             | 0.664  | 0.506                                   | not sign.    | not sign.     |
| A-Pillar | 0.654                            | 3.107  | <b><math>1.89 \times 10^{-3}</math></b> | <b>0.309</b> | <b>medium</b> | 0.138                             | 1.014  | 0.311                                   | not sign.    | not sign.     | -0.516                            | -1.535 | 0.125                                   | not sign.    | not sign.     |
| Center   | 0.025                            | 0.126  | 0.900                                   | not sign.    | not sign.     | -0.158                            | -0.641 | 0.522                                   | not sign.    | not sign.     | -0.182                            | -0.521 | 0.602                                   | not sign.    | not sign.     |
| Screen   | -0.322                           | -1.090 | 0.276                                   | not sign.    | not sign.     | 0.083                             | 0.764  | 0.445                                   | not sign.    | not sign.     | 0.405                             | 1.447  | 0.148                                   | not sign.    | not sign.     |
| S. Wheel | 0.156                            | 1.524  | 0.127                                   | not sign.    | not sign.     | 0.535                             | 3.072  | <b><math>2.12 \times 10^{-3}</math></b> | <b>0.304</b> | <b>medium</b> | 0.379                             | 1.244  | 0.214                                   | not sign.    | not sign.     |
| All      | 0.458                            | 2.799  | <b><math>5.12 \times 10^{-3}</math></b> | <b>0.279</b> | <b>weak</b>   | 0.672                             | 4.118  | <b><math>3.83 \times 10^{-5}</math></b> | <b>0.408</b> | <b>medium</b> | 0.213                             | 1.351  | 0.177                                   | not sign.    | not sign.     |

Position-preference relation: First row, Part 2

**Table S4.** Statistical evaluation of the four identified groups, differences of the mean values  $\Delta\bar{x}$ , z-score, probability value  $p$ , effect power  $r$  and quantification of it. If  $p < 0.05$ , it is bold marked. Participants for each group are summed up in the first column.

| Participants                 | 1. High (door-foot)            |        |                                          |              |               |                                |       |                                          |              |               |                                |       |                                          |              |               |
|------------------------------|--------------------------------|--------|------------------------------------------|--------------|---------------|--------------------------------|-------|------------------------------------------|--------------|---------------|--------------------------------|-------|------------------------------------------|--------------|---------------|
|                              | 2. Medium (seat-a-pillar)      |        |                                          |              |               | 3. Medium-High (center-screen) |       |                                          |              |               | 4. Contra (s.wheel-all)        |       |                                          |              |               |
|                              | $\Delta\bar{x}$                | $z$    | $p$ (asym.)                              | $r$          | level         | $\Delta\bar{x}$                | $z$   | $p$ (asym.)                              | $r$          | level         | $\Delta\bar{x}$                | $z$   | $p$ (asym.)                              | $r$          | level         |
| China:<br>Men<br>$n = 98$    | 1.036                          | 7.236  | <b><math>4.63 \times 10^{-13}</math></b> | <b>0.731</b> | <b>strong</b> | 0.867                          | 5.628 | <b><math>1.82 \times 10^{-8}</math></b>  | <b>0.569</b> | <b>strong</b> | 1.770                          | 7.971 | <b><math>1.55 \times 10^{-15}</math></b> | <b>0.805</b> | <b>strong</b> |
| China:<br>Women<br>$n = 63$  | 1.011                          | 6.151  | <b><math>7.68 \times 10^{-10}</math></b> | <b>0.775</b> | <b>strong</b> | 1.135                          | 5.540 | <b><math>3.02 \times 10^{-8}</math></b>  | <b>0.698</b> | <b>strong</b> | 2.024                          | 6.609 | <b><math>3.87 \times 10^{-11}</math></b> | <b>0.833</b> | <b>strong</b> |
| Europe:<br>Men<br>$n = 38$   | 1.956                          | 5.051  | <b><math>4.39 \times 10^{-7}</math></b>  | <b>0.819</b> | <b>strong</b> | 1.526                          | 4.703 | <b><math>2.56 \times 10^{-6}</math></b>  | <b>0.763</b> | <b>strong</b> | 2.829                          | 5.321 | <b><math>1.03 \times 10^{-7}</math></b>  | <b>0.863</b> | <b>strong</b> |
| Europe:<br>Women<br>$n = 39$ | 1.705                          | 5.137  | <b><math>2.80 \times 10^{-7}</math></b>  | <b>0.823</b> | <b>strong</b> | 1.513                          | 4.363 | <b><math>1.28 \times 10^{-5}</math></b>  | <b>0.699</b> | <b>strong</b> | 3.000                          | 5.322 | <b><math>1.03 \times 10^{-7}</math></b>  | <b>0.852</b> | <b>strong</b> |
| Participants                 | 2. Medium (seat-a-pillar)      |        |                                          |              |               |                                |       |                                          |              |               | 3. Medium-High (center-screen) |       |                                          |              |               |
|                              | 3. Medium-High (center-screen) |        |                                          |              |               | 4. Contra (s.wheel-all)        |       |                                          |              |               | 4. Contra (s.wheel-all)        |       |                                          |              |               |
|                              | $\Delta\bar{x}$                | $z$    | $p$ (asym.)                              | $r$          | level         | $\Delta\bar{x}$                | $z$   | $p$ (asym.)                              | $r$          | level         | $\Delta\bar{x}$                | $z$   | $p$ (asym.)                              | $r$          | level         |
| China:<br>Men<br>$n = 98$    | -0.168                         | -1.203 | 0.229                                    | not sign.    | not sign.     | 0.735                          | 6.052 | <b><math>1.43 \times 10^{-9}</math></b>  | <b>0.611</b> | <b>strong</b> | 0.903                          | 6.826 | <b><math>8.72 \times 10^{-12}</math></b> | <b>0.690</b> | <b>strong</b> |
| China:<br>Women<br>$n = 63$  | 0.124                          | 1.120  | 0.263                                    | not sign.    | not sign.     | 1.013                          | 6.193 | <b><math>5.90 \times 10^{-10}</math></b> | <b>0.780</b> | <b>strong</b> | 0.889                          | 5.490 | <b><math>4.01 \times 10^{-8}</math></b>  | <b>0.692</b> | <b>strong</b> |
| Europe:<br>Men<br>$n = 38$   | -0.430                         | -1.778 | 0.075                                    | not sign.    | not sign.     | 0.873                          | 3.921 | <b><math>8.80 \times 10^{-5}</math></b>  | <b>0.636</b> | <b>strong</b> | 1.303                          | 4.659 | <b><math>3.18 \times 10^{-6}</math></b>  | <b>0.756</b> | <b>strong</b> |
| Europe:<br>Women<br>$n = 39$ | -0.192                         | -0.747 | 0.455                                    | not sign.    | not sign.     | 1.295                          | 4.912 | <b><math>9.03 \times 10^{-7}</math></b>  | <b>0.787</b> | <b>strong</b> | 1.487                          | 4.791 | <b><math>1.66 \times 10^{-6}</math></b>  | <b>0.767</b> | <b>strong</b> |

S3: Combined Results

Chinese only, age-color preference relation:

**Table S1.** Statistical evaluation of the age-color preference rating, differences of the mean values  $\Delta\bar{x}$ , z-score, probability value  $p$ , effect power  $r$  and quantification of it. If  $p < 0.05$ , it is bold marked. Participants for each group are summed up in the heading.

| Color         | 1. Women: $\leq 34$ Years, $n = 32$ |        |                                         |              |               | 1. Men: $\leq 34$ Years, $n = 52$ |        |                                         |              |             |
|---------------|-------------------------------------|--------|-----------------------------------------|--------------|---------------|-----------------------------------|--------|-----------------------------------------|--------------|-------------|
|               | 2. Women: $\geq 35$ Years, $n = 31$ |        |                                         |              |               | 2. Men: $\geq 35$ Years, $n = 46$ |        |                                         |              |             |
|               | $\Delta\bar{x}$                     | $z$    | $p$ (asym.)                             | $r$          | level         | $\Delta\bar{x}$                   | $z$    | $p$ (asym.)                             | $r$          | level       |
| Red           | -0.003                              | -0.655 | 0.512                                   | not sign.    | not sign.     | -0.155                            | 0.079  | 0.937                                   | not sign.    | not sign.   |
| Orange        | 0.270                               | 0.086  | 0.931                                   | not sign.    | not sign.     | -0.047                            | 1.235  | 0.217                                   | not sign.    | not sign.   |
| Yellow        | 0.511                               | 0.200  | 0.841                                   | not sign.    | not sign.     | 0.076                             | 2.241  | <b><math>2.50 \times 10^{-2}</math></b> | <b>0.226</b> | <b>weak</b> |
| Green         | 0.431                               | -1.628 | 0.104                                   | not sign.    | not sign.     | -0.441                            | 1.887  | 0.059                                   | not sign.    | not sign.   |
| Cyan          | 0.408                               | -0.214 | 0.831                                   | not sign.    | not sign.     | -0.102                            | 1.879  | 0.060                                   | not sign.    | not sign.   |
| Blue          | -0.171                              | -1.594 | 0.111                                   | not sign.    | not sign.     | -0.401                            | -0.713 | 0.476                                   | not sign.    | not sign.   |
| Purple        | -0.035                              | -0.477 | 0.634                                   | not sign.    | not sign.     | -0.182                            | -0.06  | 0.953                                   | not sign.    | not sign.   |
| Cold White    | 0.165                               | 2.973  | <b><math>2.95 \times 10^{-3}</math></b> | <b>0.375</b> | <b>medium</b> | 0.712                             | 0.787  | 0.431                                   | not sign.    | not sign.   |
| Warm White    | -0.309                              | 2.110  | <b><math>3.49 \times 10^{-2}</math></b> | <b>0.266</b> | <b>weak</b>   | 0.541                             | -1.695 | 0.090                                   | not sign.    | not sign.   |
| Neutral White | 0.084                               | 2.204  | <b><math>2.76 \times 10^{-2}</math></b> | <b>0.278</b> | <b>weak</b>   | 0.586                             | 0.311  | 0.756                                   | not sign.    | not sign.   |

Chinese only, time-color selection relation; autonomous driving:

**Table S2.** Statistical evaluation of the time-color preference rating, differences of the mean values  $\Delta\bar{x}$ , z-score, probability value  $p$ , effect power  $r$  and quantification of it. If  $p < 0.05$ , it is bold marked. Participants for each group are summed up in the heading.

| Color         | 1. Morning, 0–12 AM, $n = 37$ |        |                                         |              |             |                               |        |                                         |              |             | 2. Day, 12–6 PM, $n = 60$     |              |                                         |              |             |
|---------------|-------------------------------|--------|-----------------------------------------|--------------|-------------|-------------------------------|--------|-----------------------------------------|--------------|-------------|-------------------------------|--------------|-----------------------------------------|--------------|-------------|
|               | 2. Day, 12–6 PM, $n = 60$     |        |                                         |              |             | 3. Evening, 6–12 PM, $n = 64$ |        |                                         |              |             | 3. Evening, 6–12 PM, $n = 64$ |              |                                         |              |             |
|               | $\Delta\bar{x}$               | $z$    | $p$ (asym.)                             | $r$          | level       | $\Delta\bar{x}$               | $z$    | $p$ (asym.)                             | $r$          | level       | $\Delta\bar{x}$               | $z$          | $p$ (asym.)                             | $r$          | level       |
| Red           | 0.035                         | −0.521 | 0.603                                   | not sign.    | not sign.   | −0.021                        | −0.280 | 0.779                                   | not sign.    | not sign.   | −0.056                        | −0.926       | 0.355                                   | not sign.    | not sign.   |
| Orange        | 0.073                         | −0.976 | 0.329                                   | not sign.    | not sign.   | 0.064                         | 0.864  | 0.388                                   | not sign.    | not sign.   | −0.008                        | −0.13721     | 0.891                                   | not sign.    | not sign.   |
| Yellow        | −0.044                        | 0.505  | 0.614                                   | not sign.    | not sign.   | −0.108                        | −1.182 | 0.237                                   | not sign.    | not sign.   | −0.064                        | −0.794       | 0.427                                   | not sign.    | not sign.   |
| Green         | 0.141                         | −1.573 | 0.116                                   | not sign.    | not sign.   | 0.027                         | 0.282  | 0.778                                   | not sign.    | not sign.   | −0.114                        | −1.4661      | 0.143                                   | not sign.    | not sign.   |
| Cyan          | −0.015                        | 0.147  | 0.883                                   | not sign.    | not sign.   | −0.117                        | −1.140 | 0.254                                   | not sign.    | not sign.   | −0.102                        | −1.144       | 0.253                                   | not sign.    | not sign.   |
| Blue          | 0.172                         | −1.784 | 0.074                                   | not sign.    | not sign.   | 0.062                         | 0.612  | 0.540                                   | not sign.    | not sign.   | −0.110                        | −1.345       | 0.179                                   | not sign.    | not sign.   |
| Purple        | 0.010                         | −0.106 | 0.916                                   | not sign.    | not sign.   | −0.085                        | −0.891 | 0.373                                   | not sign.    | not sign.   | −0.095                        | −1.164       | 0.244                                   | not sign.    | not sign.   |
| Cold White    | 0.022                         | −0.211 | 0.833                                   | not sign.    | not sign.   | 0.202                         | 2.173  | <b><math>2.98 \times 10^{-2}</math></b> | <b>0.216</b> | <b>weak</b> | <b>0.180</b>                  | <b>2.197</b> | <b><math>2.80 \times 10^{-2}</math></b> | <b>0.197</b> | <b>weak</b> |
| Warm White    | −0.076                        | 0.741  | 0.459                                   | not sign.    | not sign.   | 0.027                         | 0.282  | 0.778                                   | not sign.    | not sign.   | 0.103                         | 1.198        | 0.231                                   | not sign.    | not sign.   |
| Neutral White | −0.188                        | 1.990  | <b><math>4.66 \times 10^{-2}</math></b> | <b>0.202</b> | <b>weak</b> | −0.088                        | −1.020 | 0.308                                   | not sign.    | not sign.   | 0.100                         | 1.208        | 0.227                                   | not sign.    | not sign.   |

Within all participants, weather-color preference relation:

**Table S3.** Statistical evaluation of the weather (sunshine, no sunshine) preference rating, differences of the mean values  $\Delta\bar{x}$ , z-score, probability value  $p$ , effect power  $r$  and quantification of it. If  $p < 0.05$ , it is bold marked. Participants for each group are summed up in the heading.

| Color         | 1. Sunshine, $n = 144$ |        |                                         |              |             | 2. No Sunshine, $n = 94$ |     |             |     |       |
|---------------|------------------------|--------|-----------------------------------------|--------------|-------------|--------------------------|-----|-------------|-----|-------|
|               |                        |        |                                         |              |             |                          |     |             |     |       |
|               | $\Delta\bar{x}$        | $z$    | $p$ (asym.)                             | $r$          | level       | $\Delta\bar{x}$          | $z$ | $p$ (asym.) | $r$ | level |
| Red           | −0.192                 | 0.600  | 0.549                                   | not sign.    | not sign.   |                          |     |             |     |       |
| Orange        | −0.099                 | 0.443  | 0.658                                   | not sign.    | not sign.   |                          |     |             |     |       |
| Yellow        | −0.241                 | 1.466  | 0.143                                   | not sign.    | not sign.   |                          |     |             |     |       |
| Green         | −0.229                 | 1.434  | 0.152                                   | not sign.    | not sign.   |                          |     |             |     |       |
| Cyan          | −0.294                 | 2.145  | <b><math>3.20 \times 10^{-2}</math></b> | <b>0.139</b> | <b>weak</b> |                          |     |             |     |       |
| Blue          | −0.413                 | 3.537  | <b><math>4.05 \times 10^{-4}</math></b> | <b>0.229</b> | <b>weak</b> |                          |     |             |     |       |
| Purple        | 0.059                  | −0.385 | 0.701                                   | not sign.    | not sign.   |                          |     |             |     |       |
| Cold White    | −0.002                 | 0.242  | 0.809                                   | not sign.    | not sign.   |                          |     |             |     |       |
| Warm White    | −0.379                 | 0.833  | 0.405                                   | not sign.    | not sign.   |                          |     |             |     |       |
| Neutral White | 0.245                  | 0.233  | 0.816                                   | not sign.    | not sign.   |                          |     |             |     |       |
